# Supplementary material
Source: PubMed Central journal article supplement (PMC3209482)
Supplement: NIHMS323488-supplement-1_si_001.pdf [file NIHMS323488-supplement-1_si_001.pdf]

## **Supporting Information**

### **Crystallographic Trapping of Heme Loss Intermediates During the Nitrite-Induced Degradation of Human Hemoglobin**

*Jun Yi,<sup>‡\*</sup> Leonard M. Thomas,<sup>‡</sup> Faik N. Musayev,<sup>§</sup> Martin K. Safo,<sup>§</sup> and George B.*

*Richter-Addo<sup>‡\*</sup>*

*‡ Department of Chemistry and Biochemistry, University of Oklahoma, Norman, Oklahoma 73019, and*

*§ Department of Medicinal Chemistry, School of Pharmacy, Virginia Commonwealth University,*

*Richmond, Virginia 23298*

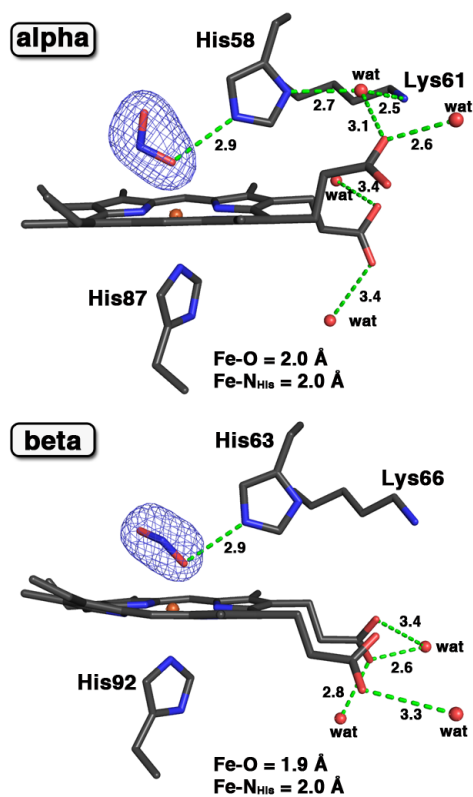

**Fig. S1.**  $F_o-F_c$  omit electron density map (contoured at  $3.0\sigma$ ) and the final model of the  $\alpha$ - and  $\beta$ -heme active sites of ferric human Hb(ONO) (PDB accession code: 3D7O, 1.8 Å resolution). The H-bonding interactions are shown as green dashed lines. The  $F_o-F_c$  difference electron density maps for water molecules are not shown here. All bonds to Fe are omitted for clarity.

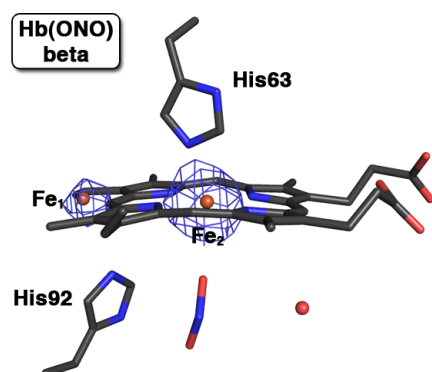

**Fig. S2.** The Fe anomalous map (contoured at  $3.0\sigma$ ) and the final model of the  $\beta$  heme site of the Hb(ONO)<sub>d,p</sub> structure (PDB accession code: 3ONZ, 2.1 Å resolution). The occupancies of Fe<sub>1</sub> and Fe<sub>2</sub> are modeled at 28% and 62%, respectively.

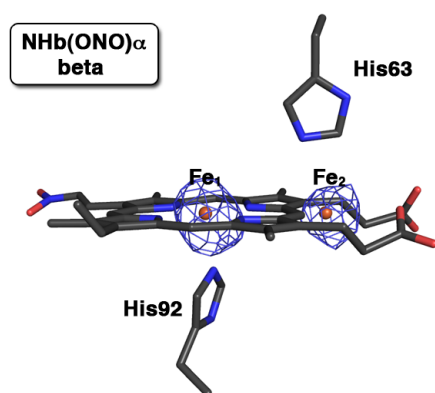

**Fig. S3.** The iron anomalous map (contoured at  $3.0\sigma$ ) and the final model of the  $\beta$  heme site of the NHb(ONO)<sub>α</sub> structure (PDB accession code: 3OO5, 2.1 Å resolution). The occupancies of Fe<sub>1</sub> and Fe<sub>2</sub> are modeled at 60% and 40%, respectively.

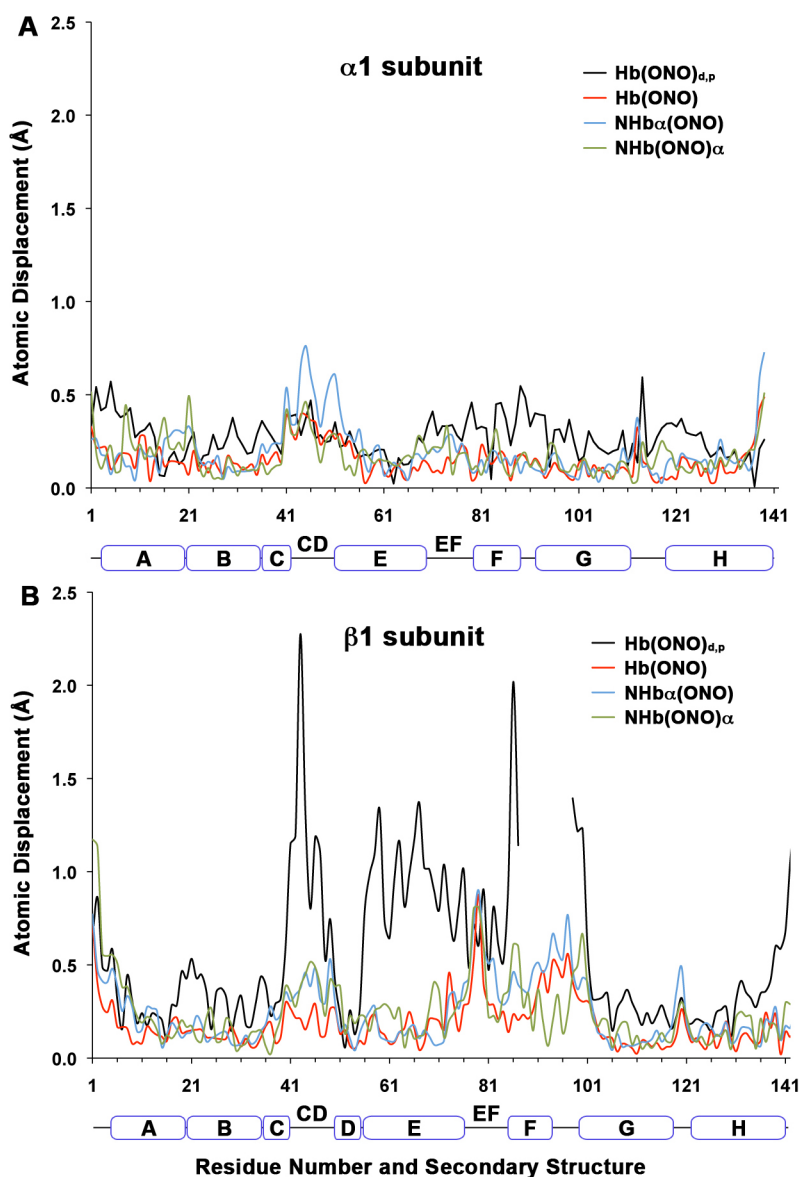

**Fig. S4.** Superposition of the  $\text{C}\alpha$  chains of four ferric *R*-state Hb nitrite structures with the  $\text{C}\alpha$  chain of the reference aquometHb structure (PDB accession code 3P5Q). Atomic displacements for (i) the  $\text{Hb(ONO)}_{d,p}$  structure is shown in black (PDB accession code 3ONZ; 2.09 Å resolution), (ii) the  $\text{Hb(ONO)}$  structure is shown in red (PDB accession code: 3D7O, 1.8 Å resolution), (iii) the  $\text{N}\alpha\text{Hb(ONO)}$  structure is shown in blue (PDB accession code: 3O04, 1.9 Å resolution), and (iv) the  $\text{NHb(ONO)}\alpha$  structure is shown in green (PDB accession code: 3O05, 2.1 Å resolution).

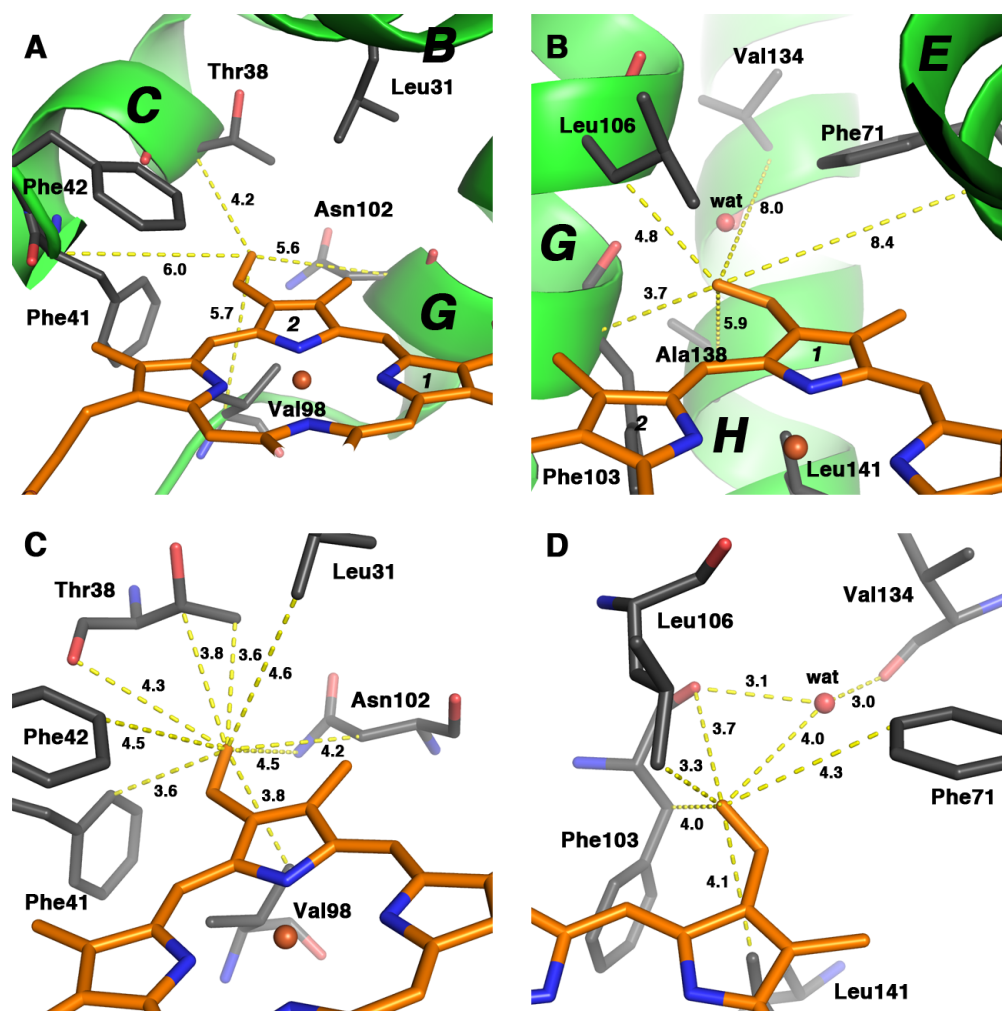

**Fig. S5.** The heme vinyl regions of the  $\beta$  subunit of ferric aquometHb (PDB accession code 3P5Q, 2.0 Å resol.). The close contacts of the terminal  $C\beta$  atoms at two vinyl positions of the  $\beta$  heme of the aquometHb structure with the protein backbones ( $C\alpha$  atoms of the nearby residues) (top panel) and the side chains of nearby residues (bottom panel) are shown as yellow dashed lines. **A)** The close contacts of the terminal  $C\beta$  atom at the 4-vinyl position with the  $C\alpha$  atoms of nearby helices (Helix C and Helix G); **B)** The close contacts of the terminal  $C\beta$  atom at the 2-vinyl position with the  $C\alpha$  atoms of nearby helices (Helix E, Helix G and Helix H); **C)** The close contacts of the terminal  $C\beta$  atom at the 4-vinyl position with the side chains of nearby residues; **D)** The close contacts of the terminal  $C\beta$  atom at the 2-vinyl position with the side chains of nearby residues.

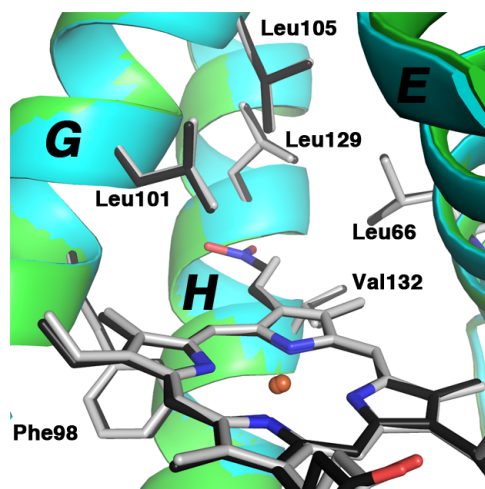

**Fig. S6.** The  $\alpha$  heme sites of the superposed final models of aquometHb (PDB accession code: 3P5Q, 2.0 Å resolution) shown in green color for helices and light gray for side chains and the  $\alpha$  heme group) and N $\alpha$ Hb(ONO) (PDB accession code: 3OO4, 1.9 Å resol., shown in cyan color for helices and dark gray for side chains and the  $\alpha$  heme group) structures.
